# Supplementary material for: Indoloindole as a new building block of a hole transport type host for stable operation in phosphorescent organic light-emitting diodes
Source: Royal Society of Chemistry journal article supplement (doi:10.1039/c9tc00701f), 2019-01-01
Supplement: c9tc00701f1.pdf [file c9tc00701f1.pdf]

## **Supporting information**

### **Indoloindole as a new building block of hole transport type host for stable operation in the phosphorescent organic light-emitting diodes**

**Ha Lim Lee, Kyung Hyung Lee, Jun Yeob Lee\***

School of Chemical Engineering, Sungkyunkwan University  
2066, Seobu-ro, Jangan-gu, Suwon-si, Gyeonggi-do, 440-746, Korea

Fax: (+) 82-31-299-4716

E-mail: leej17@skku.edu

\* To whom correspondence should be addressed

## List of Figures

Figure S1. The phosphorescent spectra of IDID and mIDIDP.

Figure S2. The device energy diagram (a) mIDIDP:TPBi and (b) TCTA:TPBi device.

Figure S3. The power efficiency-luminance plots of mIDIDP:TPBi and TCTA:TPBi device.

Figure S4. The current efficiency-luminance plots of mIDIDP:TPBi and TCTA:TPBi device.

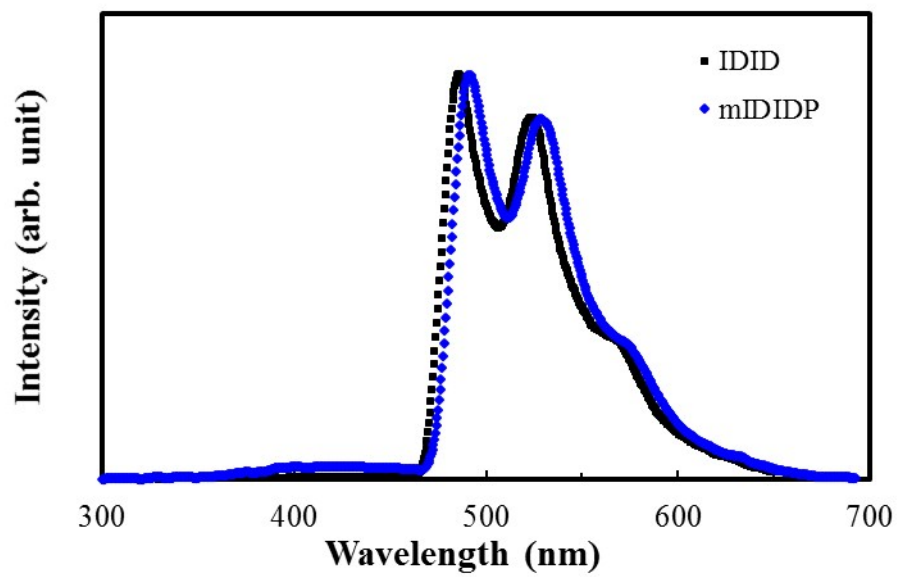

Figure S1.

(a)

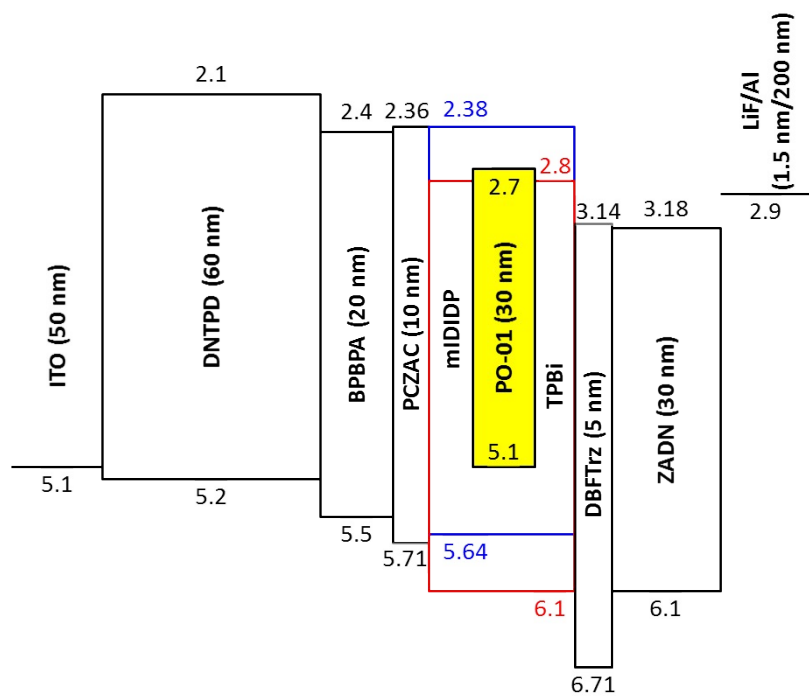

(b)

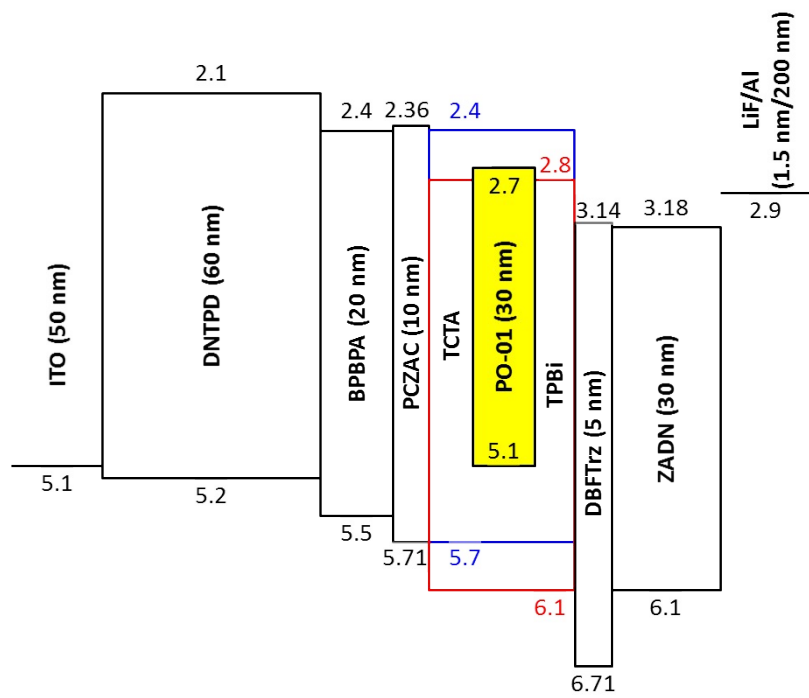

Figure S2.

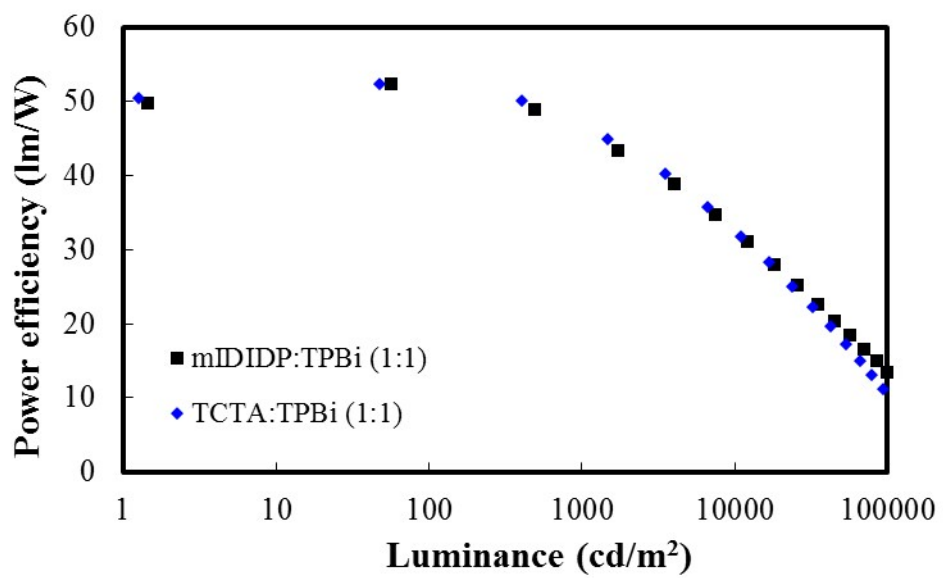

Figure S3.

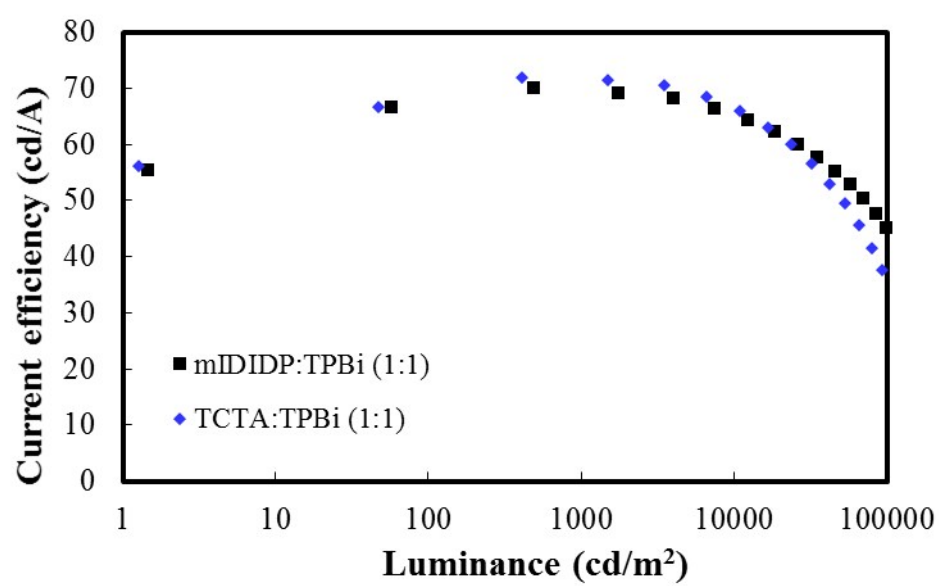

Figure S4.
